# Supplementary material for: A Selective Fluorescent l-Lactate Biosensor Based on an l-Lactate-Specific Transcription Regulator and Förster Resonance Energy Transfer
Source: MDPI journal article supplement (doi:10.3390/bios12121111), 2022-12-01
Supplement: s1 [file s1]

# A Selective Fluorescent L-Lactate Biosensor Based on an L-Lactate-Specific Transcription Regulator and Förster Resonance Energy Transfer

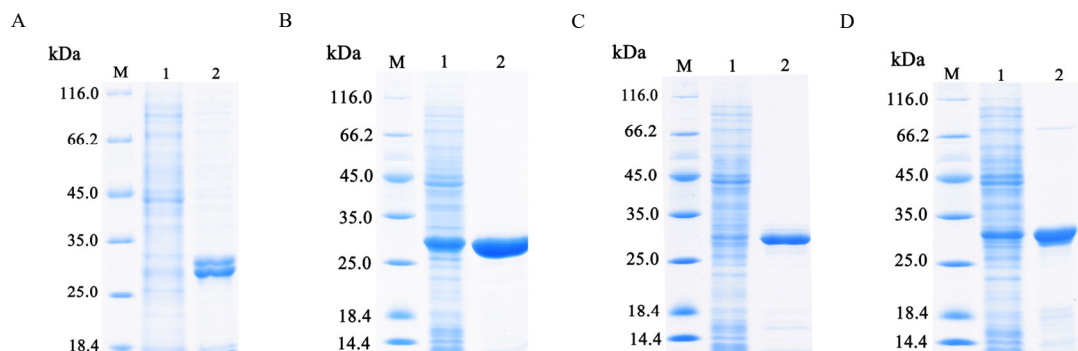

**Figure S1.** SDS-PAGE analysis of purified *EcLldR* (A), *PaLldR* (B), *PflLldR* (C), and *STLldR* (D). Lane M, molecular weight markers; lane 1, crude extract of *Escherichia coli* BL21(DE3) harboring expressing plasmids of different LldRs; lane 2, different purified His<sub>6</sub>-tagged LldRs using a HisTrap column.

```

MVSKGEETTMGVKIPDMKIKLKMEGNVNGHAFVIEG
EGEGKPYDGTNTINLEVKEGAPLPFSYDILTTFAYGN
RAFTKYPPDIPNYFKQSFPEGYSWERTMTFEDKGIVKV
KSDISMEEDSFIYEIHLKGENFPPNGPVMQKKTGWDA
STERMYVRDGVKGDVKKHLLLEGGGHHRVDFKTIY
RAKKAVKLDPDYHFVDHRIELNHDKDYNKVTVYESAV
ARNSTDGMDELYKELMIVMPKRLSDEIASRVRALIEEQ
NLEAGMKLPAERQLALQLGVSRLSLREALAKLVSEGV
LVSRRGGGTFFVRWQHETWSEQNIVQPLKMLMANDPD
YSFDILEARHAIEASTAWHAAMRATAADKEKIRLCFDA
TLSEDPDLASQADVRFHLLAIAEASHNVVLLQTMRGFF
DVLQSSVKQSRQRMVLPVPPVFSKLTEQHQAVMDAILD
GNAEGARKAMMAHLSFVHTTIKRFDEDDQARQARITRL
PGDHNEMTRENKSVDMVSKGEELFTGVVPILVELDGD
VNGHKFSVSGEGEGDATYGKLTCLKICTTGKLPVPWP
TLVTTLGYGLQCFARYPDHMKQHDFFKSAMPEGYVQ
ERTIFFKDDGNYKTRAEVKFEGDTLVNRIELKGIDFKE
DGNILGHKLEYNYNVSHNVYITADKQKNGIKANFKIRH
NIEDGGVQLADHYQQNTPIGDGPVLLPDNHYLSYQSA
LSKDPNEKRDHMLVLEFVTAAGITLGMDELYK*

```

**Figure S2.** Amino acid sequences of FILLac<sub>0NOC</sub>. The sequences of mTFP, *STLldR* and Venus are highlighted in cyan, grey and yellow, respectively. EL and VD are the amino acid sequences of the restriction sites *SacI* and *Sall*, respectively.

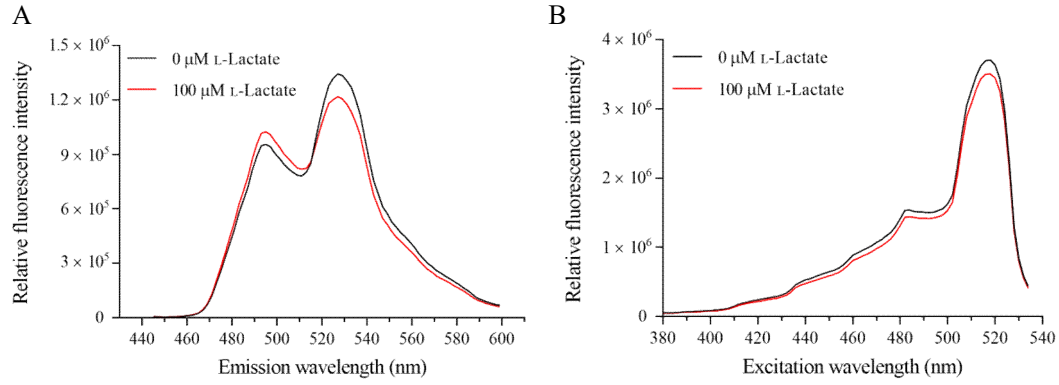

**Figure S3.** Spectral properties of FILLac<sub>10N0C</sub>. **(A)** Fluorescence emission spectrum changes of 1  $\mu$ M FILLac<sub>10N0C</sub> with (red) or without (black) 100  $\mu$ M L-lactate were indicated, excitation was measured at 430 nm with emission from 445 nm to 600 nm in steps of 2 nm. **(B)** Fluorescence excitation spectrum changes of 1  $\mu$ M FILLac<sub>10N0C</sub> with (red) or without (black) 100  $\mu$ M L-lactate were indicated, emission was measured at 550 nm with excitation from 380 nm to 535 nm in steps of 2 nm.

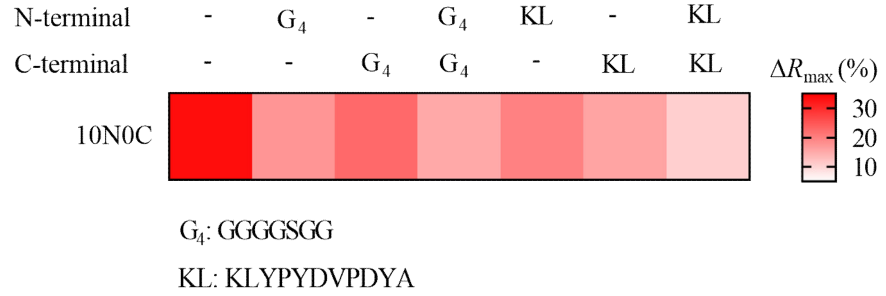

**Figure S4.** Heat map of FILLac<sub>10N0C</sub> variants with different artificial linkers added between STLIdR and fluorescent proteins to  $\Delta R_{\max}$ . G<sub>4</sub> and KL are the flexible linker Gly-Gly-Gly-Gly-Ser-Gly-Gly and the rigid linker Lys-Leu-Tyr-Pro-Tyr-Asp-Val-Pro-Asp-Tyr-Ala, respectively.

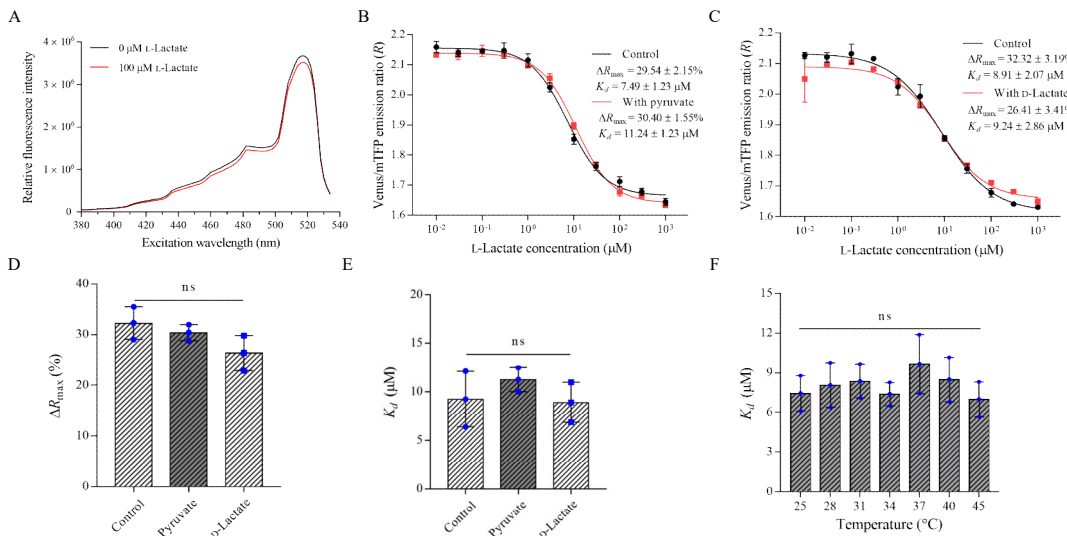

**Figure S5.** *In vitro* characterization of FILLac<sub>10N0C</sub>. **(A)** Fluorescence excitation spectrum changes of 1  $\mu$ M FILLac<sub>10N0C</sub> with (red) or without (black) 100  $\mu$ M L-lactate were indicated, emission was measured at 550 nm with excitation from 380 nm to 535 nm in 2 nm steps. **(B)** Dose-response curves of

FILLac<sub>10N0C</sub> for L-lactate in the presence (red) or absence (black) of 50  $\mu$ M pyruvate. (C) Dose-response curves of FILLac<sub>10N0C</sub> for L-lactate in the presence (red) or absence (black) of 50  $\mu$ M D-lactate. (D) Comparison of the  $\Delta R_{\max}$  of FILLac<sub>10N0C</sub> in the presence of 50  $\mu$ M D-lactate or pyruvate. (E) Comparison of the  $K_d$  values of FILLac<sub>10N0C</sub> in the presence of 50  $\mu$ M D-lactate or pyruvate. (F)  $K_d$  values of FILLac<sub>10N0C</sub> for L-lactate determined at different temperatures. All data shown are means  $\pm$  s.d. ( $n = 3$  independent experiments). The significance of the data was analyzed by a two-tailed, unpaired  $t$ -test; ns, no significant difference ( $p \geq 0.05$ ).

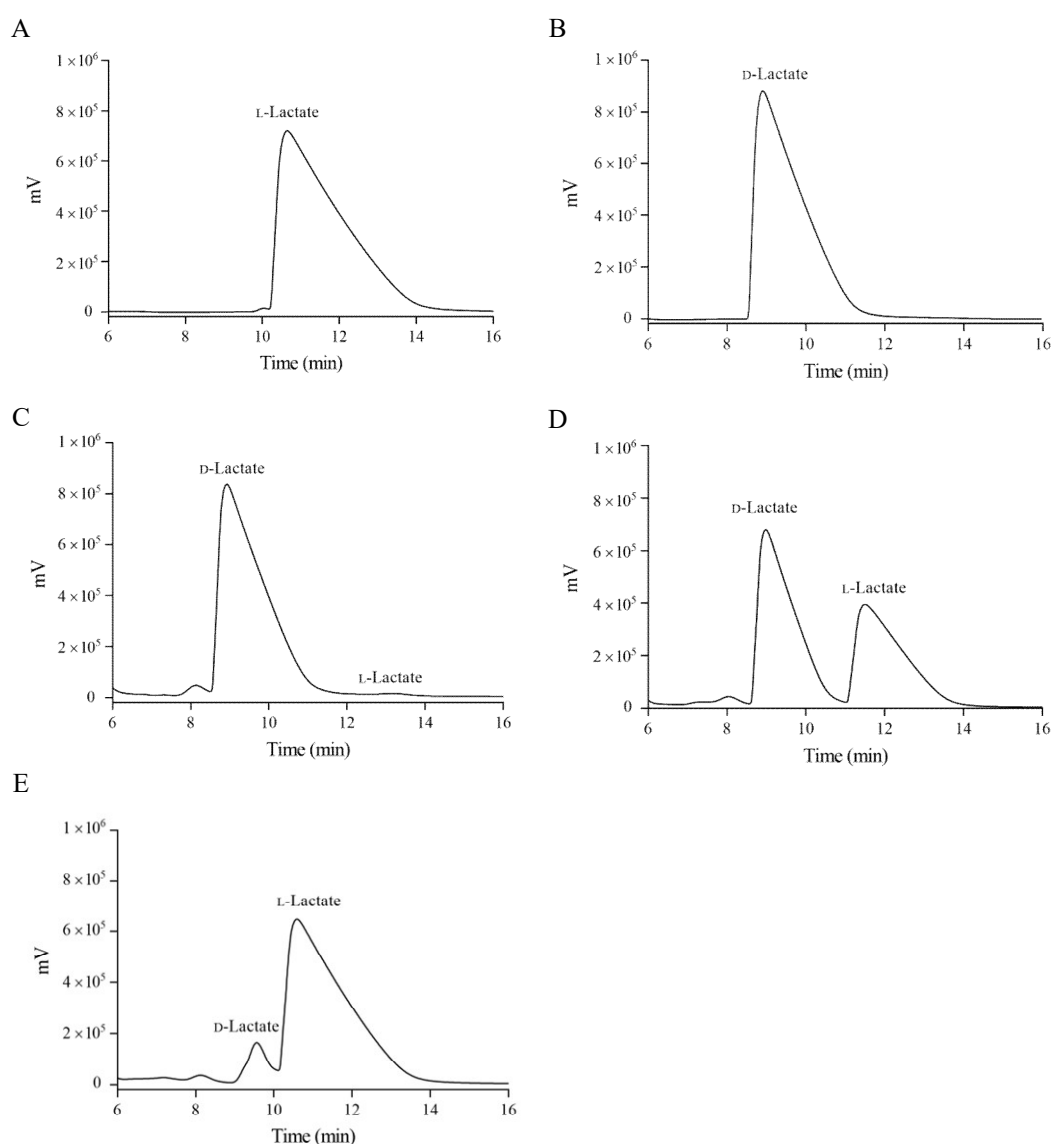

**Figure S6.** HPLC analysis of the chirality of lactate in different fermentation samples. (A,B) HPLC analysis of L-lactate standard (A) and D-lactate standard (B) by using a chiral column. (C–E) HPLC analysis of the chirality of lactate in fermentation samples produced by *L. bulgaricus* ATCC 11842 (C), *L. plantarum* ATCC 14917 (D), and *L. casei* ATCC 334 (E) by using a chiral column.

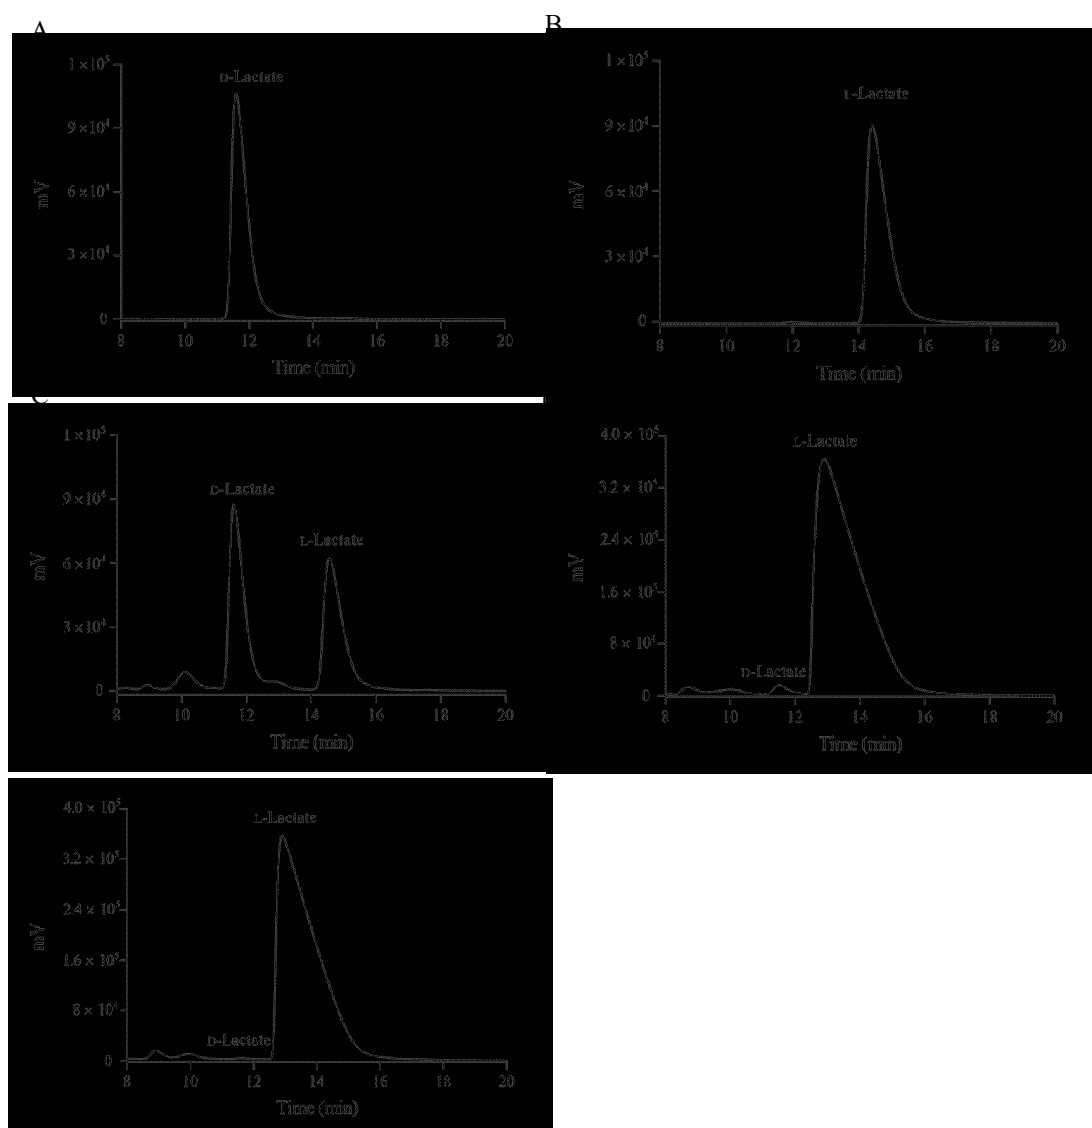

**Figure S7.** HPLC analysis of the chirality of lactate in Jiaosu and yogurt samples. (A,B) HPLC analysis of L-lactate standard (A) and D-lactate standard (B) by using a chiral column. (C–E) HPLC analysis for Jiaosu B (C), Yogurt B (D) and Yogurt C (E) by using a chiral column.

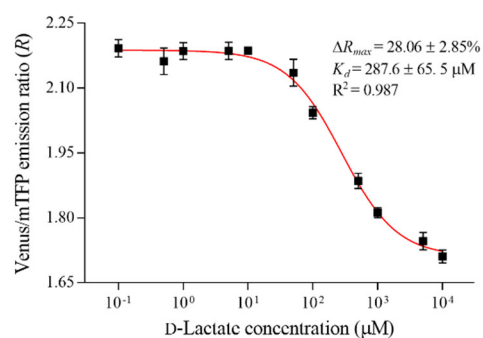

**Figure S8.** Dose-response curve of FILLac<sub>10</sub>NOC for increasing concentrations (100 nM to 10 mM) of D-lactate.

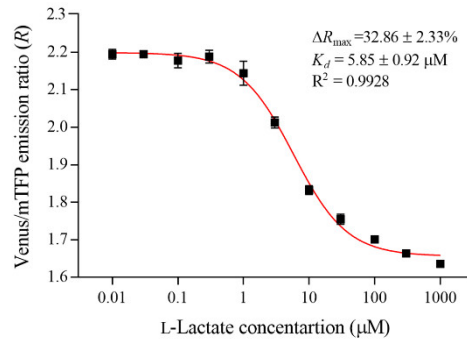

**Figure S9.** Dose-response curve of FILLac<sub>10NOC</sub> for increasing concentrations (100 nM to 10 mM) of L-lactate after stored at  $-80^{\circ}\text{C}$  for six months.

**Table S1.** Strains and plasmids used in this study.

| Strain and Plasmid                                          | Relevant Characteristics <sup>a</sup>                                                                                             | Source and Reference |
|-------------------------------------------------------------|-----------------------------------------------------------------------------------------------------------------------------------|----------------------|
| <b>Strain</b>                                               |                                                                                                                                   |                      |
| <i>E. coli</i> BL21(DE3)                                    | F <sup>-</sup> <i>ompT hsdSB (rB- mB-)</i> <i>gal</i> ( $\lambda$ c I 857 <i>ind1 Sam7 nin5 lacUV5-T7gene1</i> ) <i>dcm</i> (DE3) | Invitrogen           |
| <i>E. coli</i> BL21(DE3) (pET28a- <i>lldR</i> )             | <i>E. coli</i> BL21(DE3) harboring the plasmid pET28a- <i>lldR</i>                                                                | This study           |
| <i>E. coli</i> BL21(DE3) (pETDuet- <i>mTFP-lldR-Venus</i> ) | <i>E. coli</i> BL21(DE3) harboring the plasmid pETDuet- <i>mTFP-lldR-Venus</i>                                                    | This study           |
| <i>Lactobacillus bulgaricus</i> ATCC 11842                  | Wild-type D-lactate producing strain                                                                                              | ATCC <sup>b</sup>    |
| <i>L. plantarum</i> ATCC 14917                              | Wild-type D, L-lactate producing strain                                                                                           | ATCC <sup>b</sup>    |
| <i>L. casei</i> ATCC 334                                    | Wild-type L-lactate producing strain                                                                                              | ATCC <sup>b</sup>    |
| <b>Plasmid</b>                                              |                                                                                                                                   |                      |
| pET28a                                                      | Expression vector; Km <sup>r</sup>                                                                                                | Novagen              |
| pET28a- <i>EclldR</i>                                       | pET28a contained <i>lldR</i> of <i>E. coli</i> MG1655; Km <sup>r</sup>                                                            | This study           |
| pET28a- <i>PallldR</i>                                      | pET28a contained <i>lldR</i> of <i>Pseudomonas aeruginosa</i> PAO1; Km <sup>r</sup>                                               | (Xiao et al., 2022)  |
| pET28a- <i>PflldR</i>                                       | pET28a contained <i>lldR</i> of <i>P. fluorescens</i> A506; Km <sup>r</sup>                                                       | This study           |
| pET28a- <i>STlldR</i>                                       | pET28a contained <i>lldR</i> of <i>Salmonella enterica</i> serovar Typhimurium LT2; Km <sup>r</sup>                               | This study           |
| pETDuet-1                                                   | Expression vector; Amp <sup>r</sup>                                                                                               | Novagen              |
| pETDuet- <i>mTFP-Venus</i>                                  | pETDuet-1 contained the genes of <i>mTFP</i> and <i>Venus</i> ; Amp <sup>r</sup>                                                  | (Kang et al., 2021)  |

<sup>a</sup> Km<sup>r</sup>, kanamycin resistant; Amp<sup>r</sup>, ampicillin resistant. <sup>b</sup> ATCC: American Type Culture Collection.

**Table S2.** Evaluation of the performance of FILLac<sub>10NOC</sub> for quantification of L-lactate in various biological samples.

| Approach                | Concentration (mM) |             |              |              | Accuracy (%) <sup>a</sup> |          |          |          | Precision (RSD%) <sup>b</sup> |
|-------------------------|--------------------|-------------|--------------|--------------|---------------------------|----------|----------|----------|-------------------------------|
| Standard                | Sample 1           | Sample 2    | Sample 3     | Sample 4     | Sample 1                  | Sample 2 | Sample 3 | Sample 4 |                               |
|                         | 2                  | 4           | 20           | 40           | 2                         | 4        | 20       | 40       |                               |
| HPLC                    | 1.97 ± 0.11        | 3.98 ± 0.17 | 20.30 ± 0.75 | 40.29 ± 1.35 | 98.67                     | 99.67    | 101.52   | 100.72   | 1.07                          |
| SBA                     | 1.89 ± 0.08        | 3.70 ± 0.09 | 19.79 ± 0.94 | 39.59 ± 0.26 | 94.50                     | 92.50    | 98.95    | 98.98    | 2.82                          |
| FILLac <sub>10NOC</sub> | 1.90 ± 0.07        | 3.86 ± 0.19 | 22.08 ± 1.28 | 40.42 ± 0.59 | 95.00                     | 96.50    | 110.43   | 101.04   | 5.97                          |

<sup>a</sup> Accuracy% =  $\frac{\text{Concentration determined by different methods}}{\text{Defined concentration}}$ . <sup>b</sup> Precision% =  $\frac{\text{Standard derivation of accuracy}}{\text{Mean value of accuracy}}$ .

**Table S3.** Evaluation of the accuracy of FILLac<sub>10NOC</sub> for quantification of L-lactate in biological samples.

| Sample   | Concentration (mM)         |                    |                            | Recovery (%) <sup>d</sup> |
|----------|----------------------------|--------------------|----------------------------|---------------------------|
|          | Actual Sample <sup>a</sup> | Added <sup>b</sup> | Spiked Sample <sup>c</sup> |                           |
| Jiaosu 1 | 0.36 ± 0.03                | 5.00               | 5.23 ± 0.24                | 97.47                     |
| Jiaosu 2 | 8.83 ± 0.27                | 5.00               | 13.11 ± 1.43               | 93.15                     |
| Jiaosu 3 | 1.53 ± 0.12                | 5.00               | 6.05 ± 0.32                | 96.80                     |

<sup>a</sup> L-Lactate concentrations measured in Jiaosu samples using FILLac<sub>10NOC</sub>. <sup>b</sup> Added extra 5 mM L-lactate to Jiaosu samples. <sup>c</sup> L-Lactate concentrations measured in spiked samples using FILLac<sub>10NOC</sub>. <sup>d</sup> Recovery% =  $\frac{\text{Concentration of L-lactate in spiked sample} - \text{Concentration of L-lactate in original actual sample}}{\text{Concentration of the added L-lactate}} \times 100\%$ .

## References

1. Kang, Z.Q.; Zhang, M.M.; Gao, K.Y.; Zhang, W.; Meng, W.S.; Liu, Y.D.; Xiao, D.; Guo, S.T.; Ma, C.Q.; Gao, C.; et al. An L-2-hydroxyglutarate biosensor based on specific transcriptional regulator LhgR. *Nat. Commun.* **2021**, *12*, 3619. <http://doi.org/10.1038/s41467-021-23723-7>.
2. Xiao, D.; Hu, C.; Xu, X.; Lü, C.; Wang, Q.; Zhang, W.; Gao, C.; Xu, P.; Wang, X.; Ma, C. A D,L-lactate biosensor based on allosteric transcription factor LldR and amplified luminescent proximity homogeneous assay. *Biosens. Bioelectron.* **2022**, *211*, 114378. <https://doi.org/10.1016/j.bios.2022.114378>.
